# Supplementary material for: Adherence to colonoscopy at 1 year following resection of localized colon cancer: a retrospective cohort study
Source: PubMed Central journal article supplement — Ther Adv Gastroenterol. 2018 Mar 26;11:1756284818765920. doi: 10.1177/1756284818765920 (PMC8832335; doi:10.1177/1756284818765920), 2018-03-26
Supplement: ColonoscopySupplement.pdf [file ColonoscopySupplement.pdf]

Appendix Table 1: Billing codes for colonoscopy claims in SEER Medicare, 2002-2011

| Code  | Code Type | Definition                                                                                                                                                                                   |
|-------|-----------|----------------------------------------------------------------------------------------------------------------------------------------------------------------------------------------------|
| G0105 | HCPCS     | Colorectal cancer screening; colonoscopy on individual at high risk                                                                                                                          |
| G0121 | HCPCS     | Colorectal cancer screening; colonoscopy on individual not meeting criteria for high risk                                                                                                    |
| 44388 | CPT       | Colonoscopy through stoma; diagnostic, with or without collection of specimen(s) by brushing or washing (separate procedure)                                                                 |
| 44389 | CPT       | Colonoscopy through stoma; with biopsy, single or multiple                                                                                                                                   |
| 44390 | CPT       | Colonoscopy through stoma; with removal of foreign body                                                                                                                                      |
| 44391 | CPT       | Colonoscopy through stoma; with control of bleeding (e.g., injection, bipolar cautery, unipolar cautery, laser, heater probe, stapler, plasma coagulator)                                    |
| 44392 | CPT       | Colonoscopy through stoma; with removal of tumor(s), polyp(s) or other lesion(s) by hot biopsy forceps or bipolar cautery                                                                    |
| 44397 | CPT       | Colonoscopy through stoma; with transendoscopic stent placement (includes pre-dilation)                                                                                                      |
| 45355 | CPT       | Colonoscopy, rigid or flexible, transabdominal via colostomy, single or multiple                                                                                                             |
| 45378 | CPT       | Colonoscopy, flexible, proximal to splenic flexure; diagnostic, with or without collection of specimen(s) by brushing or washing, with or without colon decompression (separate procedure)   |
| 45379 | CPT       | Colonoscopy, flexible, proximal to splenic flexure, with removal of foreign body                                                                                                             |
| 45380 | CPT       | Colonoscopy, flexible, proximal to splenic flexure, with biopsy, single or multiple                                                                                                          |
| 45381 | CPT       | Colonoscopy, flexible, proximal to splenic flexure, with directed submucosal injection(s), any substance                                                                                     |
| 45382 | CPT       | Colonoscopy, flexible, proximal to splenic flexure; with control of bleeding (e.g., injection, bipolar cautery, unipolar cautery, laser, heater probe, stapler, plasma coagulator)           |
| 45383 | CPT       | Colonoscopy, flexible, proximal to splenic flexure; with ablation of tumor(s), polyp(s) or other lesion(s) not amenable to removal by hot biopsy forceps, bipolar cautery or snare technique |
| 45385 | CPT       | Colonoscopy, flexible, proximal to splenic flexure, with removal of tumor(s), polyp(s) or other lesion(s) by snare technique                                                                 |
| 45386 | CPT       | Colonoscopy, flexible, proximal to splenic flexure; with dilation by balloon, 1 or more strictures                                                                                           |
| 45387 | CPT       | Colonoscopy, flexible, proximal to splenic flexure; with transendoscopic stent placement (includes pre-dilation)                                                                             |
| 45391 | CPT       | Colonoscopy, flexible, proximal to splenic flexure; with endoscopic ultrasound examination                                                                                                   |
| 45392 | CPT       | Colonoscopy, flexible, proximal to splenic flexure; with transendoscopic ultrasound guided intramural or transmural fine needle aspiration/biopsy(s)                                         |
| 45.22 | ICD-9     | Endoscopy of large intestine through artificial stoma                                                                                                                                        |
| 45.23 | ICD-9     | Colonoscopy                                                                                                                                                                                  |
| 45.25 | ICD-9     | Closed [endoscopic] biopsy of large intestine                                                                                                                                                |
| 45.42 | ICD-9     | Endoscopic polypectomy of large intestine                                                                                                                                                    |
| 45.43 | ICD-9     | Endoscopic destruction of other lesion or tissue of large intestine                                                                                                                          |

Appendix Table 2: Characteristics of patients who were diagnosed as stage I-III colon cancer between 2002 and 2011 and registered in SEER Medicare who underwent colon resection and survived 3 years from surgery without recurrence

| Characteristics                                                                                   | N (%)        |
|---------------------------------------------------------------------------------------------------|--------------|
| Total                                                                                             | 28732 (100%) |
| Age at diagnosis (year)                                                                           |              |
| 65-74                                                                                             | 11000 (38%)  |
| 75-84                                                                                             | 13109 (46%)  |
| 85+                                                                                               | 4623 (16%)   |
| Gender                                                                                            |              |
| Female                                                                                            | 16744 (58%)  |
| Male                                                                                              | 11988 (42%)  |
| Year of diagnosis                                                                                 |              |
| 2002-2004                                                                                         | 10755 (37%)  |
| 2005-2007                                                                                         | 9816 (34%)   |
| 2008-2011                                                                                         | 8161 (28%)   |
| Race/ethnicity                                                                                    |              |
| Non-Hispanic white                                                                                | 23951 (83%)  |
| Non-Hispanic black                                                                                | 2150 ( 7%)   |
| Hispanic                                                                                          | 1211 ( 4%)   |
| Others §                                                                                          | 1420 ( 5%)   |
| Region                                                                                            |              |
| Eastern                                                                                           | 6294 (22%)   |
| Midwest                                                                                           | 12204 (42%)  |
| Western                                                                                           | 10234 (36%)  |
| Neighborhood                                                                                      |              |
| Large metropolitan                                                                                | 14737 (51%)  |
| Metropolitan                                                                                      | 8637 (30%)   |
| Non-metro urban/rural                                                                             | 5358 (19%)   |
| Marital                                                                                           |              |
| Single/divorced/widow                                                                             | 12749 (44%)  |
| Married/domestic partner                                                                          | 14953 (52%)  |
| Unknown                                                                                           | 1030 ( 4%)   |
| SES rank                                                                                          |              |
| 1                                                                                                 | 5113 (18%)   |
| 2                                                                                                 | 6134 (21%)   |
| 3                                                                                                 | 4470 (16%)   |
| 4                                                                                                 | 7380 (26%)   |
| 5                                                                                                 | 5633 (20%)   |
| Tumor location                                                                                    |              |
| Right-sided colon†                                                                                | 19410 (68%)  |
| Left-sided colon‡                                                                                 | 9332 (32%)   |
| Chemotherapy used                                                                                 |              |
| No                                                                                                | 24251 (84%)  |
| Yes                                                                                               | 4478 (16%)   |
| Stage                                                                                             |              |
| I                                                                                                 | 9996 (35%)   |
| II                                                                                                | 12337 (43%)  |
| III                                                                                               | 6399 (22%)   |
| Comorbidity                                                                                       |              |
| 0                                                                                                 | 15531 (54%)  |
| 1                                                                                                 | 8016 (28%)   |
| 2+                                                                                                | 5185 (18%)   |
| Number of colonoscopies within 3 year follow-up without recurrence after surgery for colon cancer |              |
| 0                                                                                                 | 7967 (28%)   |
| 1                                                                                                 | 13170 (46%)  |
| 2                                                                                                 | 6287 (22%)   |
| 3+                                                                                                | 1308 ( 5%)   |

§ Others races include Asian/Pacific Islander, American Indian/Alaskan Native, others unspecified.

† Right-sided colon includes cecum, appendix, ascending colon, hepatic flexure, transverse colon, large Intestine.

‡ Left-sided colon includes splenic flexure, descending colon, sigmoid colon. rectosigmoid colon
